# Supplementary material for: Coval: Improving Alignment Quality and Variant Calling Accuracy for Next-Generation Sequencing Data
Source: PLOS journal article supplement (doi:10.1371/journal.pone.0075402), 2013-10-08
Supplement: S14 (10.1371/journal.pone.0075402.s014) [file journal.pone.0075402.s014]

**Table S4. Number of mismatches in rice reads aligned with different alignment tools.**

| Mismatch number | Percentage of mismatch reads in aligned reads (%) <sup>a</sup> |      |           |       |                     |
|-----------------|----------------------------------------------------------------|------|-----------|-------|---------------------|
|                 | BWA                                                            | MAQ  | NovoAlign | SOAP2 | Bowtie <sup>b</sup> |
| 1               | 8.6                                                            | 8.5  | 8.8       | 3.4   | 10.5                |
| 2               | 2.7                                                            | 2.6  | 2.6       | 1.1   | 4.3                 |
| 3               | 1.6                                                            | 0.78 | 1.4       | 0     | 0                   |
| 4               | 1.2                                                            | 0.49 | 0.89      | 0     | 0                   |
| 5               | 0.4                                                            | 0.35 | 0.59      | 0     | 0                   |
| >5              | 0.8                                                            | 0.98 | 1.8       | 0     | 0                   |

Sixty-three million Illumina paired-end reads of *O. sativa* cv. Nipponbare were aligned to the rice reference (IRGSP build 5) genome using the indicated alignment tools in a seeding mode, which allows at most two mismatches within a 20–30 bp seed of reads.

<sup>a</sup> The percentage of reads with the indicated number of mismatches out of the total number of rice reads aligned to the rice reference genome.

<sup>b</sup> Version 0.12.7, which is not the latest version (Bowtie 2).
