# Supplementary material for: Coval: Improving Alignment Quality and Variant Calling Accuracy for Next-Generation Sequencing Data
Source: PLOS journal article supplement (doi:10.1371/journal.pone.0075402), 2013-10-08
Supplement: S16 (10.1371/journal.pone.0075402.s016) [file journal.pone.0075402.s016]

**Table S6. SNP/indel calling accuracy for real (experimental) and simulated reads.**

| Read                  | SNP/indel | SNP/indel calling accuracy |                      |
|-----------------------|-----------|----------------------------|----------------------|
|                       |           | True positives rate        | False positives rate |
| Real                  | SNP       | 658,735 (89.0%)            | 3,771 (0.57%)        |
|                       | Indel     | 49,152 (64.6%)             | 1,901 (3.72%)        |
| Simulated<br>(dwgsim) | SNP       | 679,856 (91.8%)            | 198 (0.03%)          |
|                       | Indel     | 54,777 (72.0%)             | 78 (0.14%)           |
| Simulated<br>(pIRS)   | SNP       | 672,398 (90.8%)            | 404 (0.06%)          |
|                       | Indel     | 53,574 (70.4%)             | 77 (0.14%)           |

Using BWA,  $6.3 \times 10^7$  experimentally obtained 75 bp paired-end reads of Nipponbare (real) were aligned to the simulated rice Nipponbare reference genome containing 0.2% artificial SNPs and 0.02% artificial indels. The same number of artificial simulated reads (75 bp paired-end) were generated using dwgsim and pIRS simulation tools with the simulated rice genome as a template. The simulated reads were aligned to the wild-type Nipponbare reference sequence, which contained no artificial SNPs/indels. SNPs and indels were called using the Coval-Call tool with  $\geq 0.8$  of variant frequency and a minimum of two supported reads at the called site.
