# Supplementary material for: Coval: Improving Alignment Quality and Variant Calling Accuracy for Next-Generation Sequencing Data
Source: PLOS journal article supplement (doi:10.1371/journal.pone.0075402), 2013-10-08
Supplement: S18 (10.1371/journal.pone.0075402.s018) [file journal.pone.0075402.s018]

**Table S8. Application of Coval to simulated rice genomes with different content of SNP.**

| SNP content (%) | Coval-Filter | Maximum Mismatch number <sup>a</sup> | Variant calling accuracy |                     |
|-----------------|--------------|--------------------------------------|--------------------------|---------------------|
|                 |              |                                      | True positive rate       | False positive rate |
| 0.001           | –            | –                                    | 32,845 (88.6%)           | 3,390 (9.36%)       |
|                 | +            | 1                                    | 31,655 (85.4%)           | 368 (1.15%)         |
|                 | +            | 2                                    | 32,478 (87.7%)           | 947 (2.83%)         |
| 0.005           | –            | –                                    | 164,885 (89.0%)          | 3,460 (2.06%)       |
|                 | +            | 1                                    | 155,377 (83.8%)          | 385 (0.25%)         |
|                 | +            | 2                                    | 162,998 (87.9%)          | 988 (0.60%)         |
| 0.02            | –            | –                                    | 658,899 (89.0%)          | 3,744 (0.57%)       |
|                 | +            | 1                                    | 562,184 (75.9%)          | 436 (0.077%)        |
|                 | +            | 2                                    | 651,419 (88.0%)          | 1,244 (0.19%)       |
|                 | +            | 3                                    | 653,118 (88.2%)          | 1,763 (0.27%)       |
| 0.5             | –            | –                                    | 1,644,446 (89.0%)        | 4,559 (0.28%)       |
|                 | +            | 2                                    | 1,578,623 (85.4%)        | 1569 (0.10%)        |
|                 | +            | 3                                    | 1,623,057 (87.8%)        | 2,203 (0.14%)       |
| 1.0             | –            | –                                    | 3,234,292 (87.7%)        | 5,501 (0.17%)       |
|                 | +            | 2                                    | 2,831,202 (76.8%)        | 2,095 (0.074%)      |
|                 | +            | 3                                    | 3,142,807 (85.3%)        | 2,874 (0.091%)      |
|                 | +            | 4                                    | 3,223,686 (87.4%)        | 3,712 (0.12%)       |

The simulated rice genome containing the indicated rate of SNP and one-tenth of the indicated rate of indel relative to the rice whole genome (383 Mb) was aligned with the rice real sequence data using BWA. The alignments were filtered (+) or not filtered (–) with Coval-Refine in the error correction mode, and SNPs were called using Coval-Call with “minimum allele frequency=0.8” and “minimum number of reads supporting non-reference allele=2”.

<sup>a</sup> Coval-Refine removes reads with mismatches larger than the indicated number.
