# Supplementary material for: Coval: Improving Alignment Quality and Variant Calling Accuracy for Next-Generation Sequencing Data
Source: PLOS journal article supplement (doi:10.1371/journal.pone.0075402), 2013-10-08
Supplement: S19 (10.1371/journal.pone.0075402.s019) [file journal.pone.0075402.s019]

**Table S9. Application of Coval to simulated rice genomes with different content of indel.**

| Indel content (%) | Coval-Filter | Maximum Mismatch number <sup>a</sup> | Variant calling accuracy |                     |
|-------------------|--------------|--------------------------------------|--------------------------|---------------------|
|                   |              |                                      | True positive rate       | False positive rate |
| 0.0001            | –            | –                                    | 2,491 (66.9%)            | 1,806 (42.0%)       |
|                   | +            | 1                                    | 3,015 (81.0%)            | 625 (17.2%)         |
|                   | +            | 2                                    | 3,090 (83.0%)            | 834 (21.3%)         |
| 0.0005            | –            | –                                    | 12,252 (66.1%)           | 1,821 (12.9%)       |
|                   | +            | 1                                    | 14,559 (78.6%)           | 628 (4.14%)         |
|                   | +            | 2                                    | 15,233 (82.2%)           | 857 (5.33%)         |
| 0.002             | –            | –                                    | 49,152 (64.6%)           | 1,901 (3.72%)       |
|                   | +            | 1                                    | 52,063 (68.4%)           | 581 (1.10%)         |
|                   | +            | 2                                    | 60,661 (79.7%)           | 953 (1.55%)         |
|                   | +            | 3                                    | 60,835 (79.9%)           | 1097 (1.77%)        |
| 0.05              | –            | –                                    | 123,944 (66.9%)          | 2,114 (1.68%)       |
|                   | +            | 2                                    | 146,736 (79.2%)          | 1,291 (0.87%)       |
|                   | +            | 3                                    | 150,938 (81.5%)          | 1,453 (0.95%)       |
| 0.1               | –            | –                                    | 237,905 (64.2%)          | 2,611 (1.09%)       |
|                   | +            | 2                                    | 263,930 (71.2%)          | 1,683 (0.63%)       |
|                   | +            | 3                                    | 292,932 (79.0%)          | 2,091 (0.71%)       |
|                   | +            | 4                                    | 300,058 (81.0%)          | 2,269 (0.75%)       |

The simulated rice genome containing the indicated rate of indel and ten-fold of the indicated rate of SNP relative to the rice whole genome (383 Mb) was aligned with the rice real sequence data using BWA. Indel calling conditions with Coval-Call are as in Table S8.

<sup>a</sup> Coval-Refine removes reads with mismatches larger than the indicated number.
