# Supplementary material for: Coval: Improving Alignment Quality and Variant Calling Accuracy for Next-Generation Sequencing Data
Source: PLOS journal article supplement (doi:10.1371/journal.pone.0075402), 2013-10-08
Supplement: S21 (10.1371/journal.pone.0075402.s021) [file journal.pone.0075402.s021]

**Table S11. Calling accuracy of heterozygous SNPs with simulated reads.**

| Simulator | Coval-Refine | SNP calling accuracy |                     |
|-----------|--------------|----------------------|---------------------|
|           |              | True positive rate   | False positive rate |
| dwgsim    | –            | 649,339 (96.7%)      | 3,679 (0.56%)       |
|           | +            | 643,233 (95.8%)      | 291 (0.045%)        |
| pIRS      | –            | 676,372 (90.7%)      | 379 (0.056%)        |
|           | +            | 673,110 (90.3%)      | 149 (0.022%)        |

The wild-type Nipponbare rice reference was aligned using BWA with 120 million simulated 75 bp paired-end reads generated by dwgsim or pIRS simulators. The simulated reads contained heterozygous SNPs, homozygous short indels, and sequencing errors, corresponding to 0.2%, 0.02%, and 0.6% (0.38% for pIRS) of the rice genome, respectively. The alignment data were filtered (+) or not filtered (–) using the Coval-Refine tool in the basic mode with an option ‘minimum mapping quality=1’ and without local realignment. SNPs were called using Coval-Call with  $\geq 0.2$  of variant frequency, a minimum of two supported reads for homozygous SNPs, and a minimum of three supported reads for heterozygous SNPs.
