# Supplementary material for: Coval: Improving Alignment Quality and Variant Calling Accuracy for Next-Generation Sequencing Data
Source: PLOS journal article supplement (doi:10.1371/journal.pone.0075402), 2013-10-08
Supplement: S26 (10.1371/journal.pone.0075402.s026) [file journal.pone.0075402.s026]

**Table S16. SNP/indel calling accuracy of Coval for nematode alignment data.**

| Called variant | Coval-Refine   | SNP/indel calling accuracy |                     |
|----------------|----------------|----------------------------|---------------------|
|                |                | True positive rate         | False positive rate |
| SNP            | —              | 187,635 (93.9%)            | 1,029 (0.55%)       |
|                | + <sup>a</sup> | 184,834 (92.5%)            | 541 (0.29%)         |
|                | + <sup>b</sup> | 184,679 (92.5%)            | 531 (0.29%)         |
| Indel          | —              | 15,506 (77.5%)             | 177 (1.13%)         |
|                | + <sup>a</sup> | 17,329 (86.7%)             | 229 (1.30%)         |
|                | + <sup>b</sup> | 17,299 (86.5%)             | 234 (1.33%)         |

A simulated nematode genome was aligned with nematode real (experimental) sequence data using BWA. The alignments were filtered (–) or not filtered (+) with Coval-Refine in the basic or error correction mode with ‘maximum number of mismatch=3’, and homozygous SNPs were called using Coval-Call with “minimum allele frequency=0.8” and “minimum number of reads supporting non-reference allele=2”.

<sup>a</sup> Coval-Refine without error correction.

<sup>b</sup> Coval-Refine with error correction.
